# Supplementary material
Source: PubMed Central journal article supplement (PMC7492437)
Supplement: NIHMS1573256-supplement-1.pdf [file NIHMS1573256-supplement-1.pdf]

## SUPPLEMENTAL MATERIALS

### Supplemental Table 1. Model parameters

| Parameter name                              | Variable                                  | Value*                                                                                                                                                                                                                                                                                                                                                                                                                                                                                                                                                                                                                                                                                                                                                                     | Unit                                                       | Source |
|---------------------------------------------|-------------------------------------------|----------------------------------------------------------------------------------------------------------------------------------------------------------------------------------------------------------------------------------------------------------------------------------------------------------------------------------------------------------------------------------------------------------------------------------------------------------------------------------------------------------------------------------------------------------------------------------------------------------------------------------------------------------------------------------------------------------------------------------------------------------------------------|------------------------------------------------------------|--------|
| <b>Physical characteristics</b>             |                                           |                                                                                                                                                                                                                                                                                                                                                                                                                                                                                                                                                                                                                                                                                                                                                                            |                                                            |        |
| Female reference BMI                        | $BMI_{Fem}^{Ref}$                         | (0.0417,14.2),(0.125,14.9),(0.208,15.5),(0.292,16),(0.375,16.5),(0.458,16.8),(0.542,17.1),(0.625,17.2),(0.708,17.4),(0.792,17.4),(0.875,17.5),(0.958,17.5),(1.04,17.5),(1.13,17.4),(1.21,17.4),(1.29,17.3),(1.38,17.2),(1.46,17.1),(1.54,17),(1.63,16.9),(1.71,16.8),(1.79,16.7),(1.88,16.5),(1.96,16.4),(2.04,16.4),(2.13,16.2),(2.21,15.8),(3.29,15.6),(3.79,15.4),(4.29,15.2),(4.79,15.2),(5.29,15.2),(5.79,15.2),(6.29,15.3),(6.79,15.4),(7.29,15.5),(7.79,15.7),(8.29,15.9),(8.79,16.2),(9.29,16.4),(9.79,16.7),(10.3,17),(10.8,17.3),(11.3,17.6),(11.8,17.9),(12.3,18.3),(12.8,18.6),(13.3,18.9),(13.8,19.2),(14.3,19.5),(14.8,19.8),(15.3,20.1),(15.8,20.3),(16.3,20.6),(16.8,20.8),(17.3,21),(17.8,21.2),(18.3,21.4),(18.8,21.5),(19.3,21.6),(19.8,21.7),(20,21.7) | Age in Year, Kg/M <sup>2</sup> (Age, BMI)                  | (1)    |
| Male reference BMI                          | $BMI_{Mal}^{Ref}$                         | (0.0417,14.4),(0.125,15.2),(0.208,16),(0.292,16.6),(0.375,17.1),(0.458,17.5),(0.542,17.7),(0.625,17.9),(0.708,18),(0.792,18.1),(0.875,18.1),(0.958,18.1),(1.04,18.1),(1.13,18),(1.21,17.9),(1.29,17.8),(1.38,17.6),(1.46,17.5),(1.54,17.4),(1.63,17.2),(1.71,17.1),(1.79,17),(1.88,16.8),(1.96,16.7),(2.04,16.6),(2.13,16.4),(2.21,16.1),(3.29,15.9),(3.79,15.7),(4.29,15.6),(4.79,15.5),(5.29,15.4),(5.79,15.4),(6.29,15.4),(6.79,15.5),(7.29,15.6),(7.79,15.7),(8.29,15.9),(8.79,16.1),(9.29,16.3),(9.79,16.5),(10.3,16.8),(10.8,17.1),(11.3,17.3),(11.8,17.7),(12.3,18),(12.8,18.3),(13.3,18.6),(13.8,19),(14.3,19.3),(14.8,19.7),(15.3,20),(15.8,20.4),(16.3,20.7),(16.8,21.1),(17.3,21.4),(17.8,21.7),(18.3,22.1),(18.8,22.4),(19.3,22.6),(19.8,22.9),(20,23)         | Age in Year, Kg/M <sup>2</sup> (Age, BMI)                  | (1)    |
| Female reference height                     | $H_{Fem}^{Ref}$                           | (0.0417,51.7),(0.125,55.3),(0.208,58.1),(0.292,60.5),(0.375,62.5),(0.458,64.4),(0.542,66.1),(0.625,67.7),(0.708,69.2),(0.792,70.6),(0.875,71.9),(0.958,73.2),(1.04,74.4),(1.13,75.6),(1.21,76.7),(1.29,77.8),(1.38,78.8),(1.46,79.8),(1.54,80.8),(1.63,81.8),(1.71,82.7),(1.79,83.6),(1.88,84.5),(1.96,85.3),(2.04,85.3),(2.13,85.3),(2.21,85.3),(2.29,88),(2.79,92.4),(3.29,95.9),(3.79,99.3),(4.29,103),(4.79,106),(5.29,110),(5.79,113),(6.29,117),(6.79,120),(7.29,123),(7.79,126),(8.29,129),(8.79,132),(9.29,134),(9.79,137),(10.3,140),(10.8,143),(11.3,146),(11.8,150),(12.3,153),(12.8,156),(13.3,158),(13.8,160),(14.3,161),(14.8,162),(15.3,162),(15.8,162),(16.3,163),(16.8,163),(17.3,163),(17.8,163),(18.3,163),(18.8,163),(19.3,163),(19.8,163)             | Age in Year, cm (Age, height)                              | (1)    |
| Male reference height                       | $H_{Mal}^{Ref}$                           | (0.0417,52.7),(0.125,56.6),(0.208,59.6),(0.292,62.1),(0.375,64.2),(0.458,66.1),(0.542,67.9),(0.625,69.5),(0.708,70.9),(0.792,72.3),(0.875,73.7),(0.958,74.9),(1.04,76.1),(1.13,77.3),(1.21,78.4),(1.29,79.4),(1.38,80.5),(1.46,81.4),(1.54,82.4),(1.63,83.3),(1.71,84.2),(1.79,85.1),(1.88,86),(1.96,86.8),(2.04,86.5),(2.13,86.5),(2.21,86.5),(2.29,89.2),(2.79,93.4),(3.29,97.2),(3.79,101),(4.29,104),(4.79,108),(5.29,111),(5.79,114),(6.29,117),(6.79,120),(7.29,124),(7.79,127),(8.29,130),(8.79,132),(9.29,135),(9.79,138),(10.3,140),(10.8,142),(11.3,145),(11.8,148),(12.3,151),(12.8,154),(13.3,158),(13.8,162),(14.3,166),(14.8,169),(15.3,171),(15.8,173),(16.3,174),(16.8,175),(17.3,176),(17.8,176),(18.3,176),(18.8,177),(19.3,177),(19.8,177)              | Age in Year, cm (Age, height)                              | (1)    |
| Female reference fat mass index             | $FMI_{Fem}^{Ref}$                         | (0.1,92),(0.25,5.16),(0.5,5.52),(0.75,4.9),(1.4,62),(1.5,4.27),(2.3,97),(3.3,66),(4.3,38),(5.3,3),(6.3,54),(7.3,77),(8.4,01),(9.4,24),(10.4,46),(11.4,68),(12.4,9),(13.5,11),(14.5,32),(15.5,51),(16.5,7),(17.5,88),(18.6,05),(19.6,21),(20.6,37),(80,6.55)                                                                                                                                                                                                                                                                                                                                                                                                                                                                                                                | Age in Year, Kg/M <sup>2</sup> (Age, FMI)                  | (2-4)  |
| Male reference fat mass index               | $FMI_{Mal}^{Ref}$                         | (0.1,6),(0.25,5.1),(0.5,5.03),(0.75,4.49),(1.4,42),(1.5,4.15),(2.4,04),(3.3,54),(4.3,21),(5.2,84),(6.2,65),(7.2,45),(8.2,54),(9.2,98),(10.3,37),(11.3,52),(12.3,4),(13.3,18),(14.3,02),(15.2,9),(16.2,84),(17.2,9),(18.3,14),(19.3,55),(20.4,01),(80,5.31)                                                                                                                                                                                                                                                                                                                                                                                                                                                                                                                 | Age in Year, Reference FMI in Kg/M <sup>2</sup> (Age, FMI) | (2-4)  |
| Female reference fractional cellularity     | $CL_{Fem}^{Ref}$                          | (0,0.85),(1,0.894),(2,0.928),(3,0.947),(4,0.958),(5,0.966),(6,0.974),(7,0.98),(8,0.988),(9,0.997),(10,1),(20,1),(80,0.895)                                                                                                                                                                                                                                                                                                                                                                                                                                                                                                                                                                                                                                                 | Age in Year, Reference Fractional Cellularity              | (5)    |
| Male reference fractional cellularity       | $CL_{Mal}^{Ref}$                          | (0,0.8),(1,0.83),(2,0.871),(3,0.897),(4,0.918),(5,0.934),(6,0.946),(7,0.957),(8,0.968),(9,0.979),(10,0.99),(11,1),(20,1),(80,0.825)                                                                                                                                                                                                                                                                                                                                                                                                                                                                                                                                                                                                                                        | Age in Year, Reference Fractional Cellularity              | (5)    |
| Fractional weight of the four active organs | $\sum_{i=1}^4 \frac{M_i^{Ref}}{BW^{Ref}}$ | (0,0.152),(1,0.145),(2,0.132),(3,0.124),(4,0.119),(5,0.106),(6,0.0984),(7,0.0917),(8,0.0833),(9,0.0803),(10,0.077),(11,0.0732),(12,0.0707),(13,0.0663),(14,0.062),(15,0.0592),(16,0.0578),(17,0.0566),(18,0.0573),(20,0.0543)                                                                                                                                                                                                                                                                                                                                                                                                                                                                                                                                              | kg                                                         | (6)    |

|                                                                                  |                                           |                                                                                                                                                                                                                                                                                 |                                                                |                                            |
|----------------------------------------------------------------------------------|-------------------------------------------|---------------------------------------------------------------------------------------------------------------------------------------------------------------------------------------------------------------------------------------------------------------------------------|----------------------------------------------------------------|--------------------------------------------|
| Female reference physical activity level                                         | $PAL_{Fem}^{Ref}$                         | (0,1.3),(1.5,1.42),(2.5,1.42),(3.5,1.44),(4.5,1.49),(5.5,1.53),(6.5,1.56),(7.5,1.6),(8.5,1.63),(9.5,1.66),(10.5,1.71),(11.5,1.74),(12.5,1.76),(13.5,1.76),(14.5,1.75),(15.5,1.73),(16.5,1.73),(17.5,1.72),(20,1.62),(30,1.48),(40,1.41),(50,1.36),(60,1.32),(70,1.28),(80,1.25) | Age in Year, Reference physical activity level (dimensionless) | (4, 7)                                     |
| Male reference physical activity level                                           | $PAL_{Mal}^{Ref}$                         | (0,1.3),(1.5,1.43),(2.5,1.45),(3.5,1.44),(4.5,1.49),(5.5,1.53),(6.5,1.57),(7.5,1.6),(8.5,1.63),(9.5,1.66),(10.5,1.71),(11.5,1.75),(12.5,1.79),(13.5,1.82),(14.5,1.84),(15.5,1.84),(16.5,1.84),(17.5,1.83),(20,1.75),(30,1.55),(40,1.45),(50,1.38),(60,1.33),(70,1.3),(80,1.27)  | Age in Year, Reference physical activity level (dimensionless) | (4, 7)                                     |
| <b>Energy needs and densities</b>                                                |                                           |                                                                                                                                                                                                                                                                                 |                                                                |                                            |
| BMR contribution of Brain, Kidneys, Liver, Heart based on organ specific weights | $\sum_{i=1}^4 \frac{M_i^{Ref}}{BW^{Ref}}$ | $Max(31.4 + 189.9e^{-0.107 \cdot age}, 59.05)$                                                                                                                                                                                                                                  | KJ/Kg/day                                                      | (5)                                        |
| Maximum energy density of lean mass                                              | $\rho_L^{Adult}$                          | 5000                                                                                                                                                                                                                                                                            | KJ/Kg                                                          | (8)                                        |
| Minimum energy density of lean mass                                              | $\rho_L^{Base}$                           | 3514                                                                                                                                                                                                                                                                            | KJ/Kg                                                          | (8)                                        |
| Slope of lean mass energy density with respect to lean mass                      | $\alpha_\rho$                             | 18                                                                                                                                                                                                                                                                              | KJ/Kg <sup>2</sup>                                             | (8)                                        |
| Energy density of fat mass                                                       | $\rho_F$                                  | 39500                                                                                                                                                                                                                                                                           | KJ/Kg                                                          | (9)                                        |
| Energy need for turnover of lean mass                                            | $\eta_L$                                  | 960                                                                                                                                                                                                                                                                             | KJ/Kg                                                          | (9)                                        |
| Energy need for turnover of fat mass                                             | $\eta_F$                                  | 750                                                                                                                                                                                                                                                                             | KJ/Kg                                                          | (9)                                        |
| Energy requirements of active organs                                             | $\gamma_{\Delta L}$                       | 92                                                                                                                                                                                                                                                                              | KJ/Kg/Day                                                      | (9)                                        |
| Energy requirement of structural muscle and other residual lean tissue           | $\gamma_5$                                | 54                                                                                                                                                                                                                                                                              | KJ/Kg/Day                                                      | (5, 10)                                    |
| Energy requirements for unit fat mass                                            | $\gamma_F$                                | 13                                                                                                                                                                                                                                                                              | KJ/Kg/Day                                                      | (9)                                        |
| <b>Other Factors</b>                                                             |                                           |                                                                                                                                                                                                                                                                                 |                                                                |                                            |
| Growth projection horizon                                                        | $d$                                       | 0.02                                                                                                                                                                                                                                                                            | Year                                                           |                                            |
| Time to consume or adjust body mass reserves                                     | $\tau$                                    | 30                                                                                                                                                                                                                                                                              | Days                                                           |                                            |
| Slope of height growth rate reaction to relative BMI                             | $s_H$                                     | 8                                                                                                                                                                                                                                                                               | Dimensionless                                                  |                                            |
| Maximum catch up growth rate relative to normal height growth for age            | $v_H$                                     | 4                                                                                                                                                                                                                                                                               | Dimensionless                                                  | (11)                                       |
| Energy partitioning factor                                                       | $c$                                       | 10.4                                                                                                                                                                                                                                                                            | Kg                                                             | Based on Forbes partitioning equation (12) |

|                                                  |           |      |               |     |
|--------------------------------------------------|-----------|------|---------------|-----|
| Fat mass fraction of active metabolic organs     | $f_{FM}$  | 0.1  | Dimensionless | (5) |
| Thermic cost of eating                           | $\beta$   | 0.1  | Dimensionless | (9) |
| Weight of WHO based projection on desired weight | $sb$      | 0.5  | Dimensionless |     |
| Adaptive thermogenesis effect                    | $\beta_T$ | 0.14 | Dimensionless | (9) |

\*Simulations use linear interpolation between data-points reported in the table.

## References

1. Kuczmarski RJ, Ogden CL, Grummer-Strawn LM, Flegal KM, Guo SS, Wei R, Mei Z, Curtin LR, Roche AF, Johnson CL 2000 CDC growth charts: United States. *Adv Data*:1-27.
2. Wells JC, Williams JE, Chomtho S, Darch T, Grijalva-Eternod C, Kennedy K, Haroun D, Wilson C, Cole TJ, Fewtrell MS 2012 Body-composition reference data for simple and reference techniques and a 4-component model: a new UK reference child. *Am J Clin Nutr* 96:1316-1326.
3. Butte NF, Hopkinson JM, Wong WW, Smith EO, Ellis KJ 2000 Body composition during the first 2 years of life: an updated reference. *Pediatr Res* 47:578-585.
4. CDC 2013 National Health and Nutrition Examination Survey. Centers for Disease Control and Prevention.
5. Wang ZM 2012 High ratio of resting energy expenditure to body mass in childhood and adolescence: A mechanistic model. *American Journal of Human Biology* 24:460-467.
6. Altman PL, Dittmer DS 1962 Growth including reproduction and morphological development. Federation of American Societies for Experimental Biology, Washington,, pp xii, 608 p.
7. Torun B 2005 Energy requirements of children and adolescents. *Public Health Nutrition* 8:968-993.
8. Hall KD, Butte NF, Swinburn BA, Chow CC 2013 Quantifying the Dynamics of Childhood Growth and Obesity. *Lancet Diabetes and Endocrinology* 1:97-105.
9. Hall KD, Sacks G, Chandramohan D, Chow CC, Wang YC, Gortmaker SL, Swinburn BA 2011 Quantification of the effect of energy imbalance on bodyweight. *Lancet* 378:826-837.

10. Wang Z, Heshka S, Heymsfield SB, Shen W, Gallagher D 2005 A cellular-level approach to predicting resting energy expenditure across the adult years. *Am J Clin Nutr* 81:799-806.
11. Walker SP, Golden MH 1988 Growth in length of children recovering from severe malnutrition. *Eur J Clin Nutr* 42:395-404.
12. Hall KD 2007 Body fat and fat-free mass inter-relationships: Forbes's theory revisited. *Br J Nutr* 97:1059-1063.
